# Supplementary material for: Application of Rigidity Theory to the Thermostabilization of Lipase A from Bacillus subtilis
Source: PubMed Central journal article supplement (PMC4803202; doi:10.1371/journal.pcbi.1004754), 2016-03-22
Supplement: pcbi.1004754.s011.pdf [file pcbi.1004754.s011.pdf]

**Table S3.** *BsLipA* variants and mutagenesis primer sequences

| <b>Mutation</b> | <b>Forward primer sequence</b>                       | <b>Reverse Primer sequence</b>              |
|-----------------|------------------------------------------------------|---------------------------------------------|
| G104I           | GTCGTGACGCTTGGC <b>atc</b> GCGAACCGTTTGACG           | CGTCAAACGGTTCGC <b>gat</b> GCCAAGCGTCACGAC  |
| G104L           | GTCGTGACGCTTGGC <b>ctg</b> GCGAACCGTTTGACG           | CGTCAAACGGTTCGC <b>cag</b> GCCAAGCGTCACGAC  |
| L55F            | AACAATGGACCGGT <b>Attc</b> TCACGATTTGTGCAA           | TTGCACAAATCGTG <b>Agaa</b> TACCGGTCCATTGTT  |
| V59F            | GTATTATCACGATTT <b>ttc</b> CAAAAAGGTTTTAGAT          | ATCTAAAACCTTTT <b>Ggaa</b> AAATCGTGATAATAC  |
| I122W           | CAGATCCAAATCA <b>Atgg</b> ATTTTATACACATCC            | GGATGTGTATAAAA <b>Tcca</b> TTGATTTGGATCTG   |
| L160H           | GGACACATCGGCCT <b>Tcat</b> TACAGCAGCCAAGTC           | GACTTGGCTGCTGT <b>Aatg</b> AAGGCCGATGTGTCC  |
| N51F            | GGCACAAATTATA <b>AAttc</b> GGACCGGTATTATCA           | TGATAATACCGGTCC <b>gaa</b> GTTATAATTTGTGCC  |
| G52M            | CACAAATTATA <b>CAAA</b> T <b>atg</b> CCGGTATTATCACGA | TCGTGATAATACCGG <b>cat</b> ATTGTTATAATTTGTG |
| V54H            | TATAACAATGGACCG <b>cat</b> TTATCACGATTTGTG           | CACAAATCGTGATA <b>AAatg</b> CGGTCCATTGTTATA |
| F58I            | CCGGTATTATCACGA <b>atc</b> GTGCAAAAAGGTTTTA          | TAAAACCTTTTGCAC <b>gat</b> TCGTGATAATACCGG  |
| I87W            | GAACACACTTTACT <b>Actg</b> AAAAATCTGGACGGC           | GCCGTCCAGATTTT <b>Tcca</b> GTAGTAAAGTGTGTTT |
| V96S            | GACGGCGGAAATA <b>AAAgc</b> GCAAACGTCGTGACG           | CGTCACGACGTTTGC <b>get</b> TTTATTTCCGCCGTC  |
